# Supplementary material for: Antioxidant and Antibacterial Activity of Extracts from Selected Plant Material
Source: MDPI journal article supplement (doi:10.3390/app12199871), 2022-09-30
Supplement: s1 [file s1]

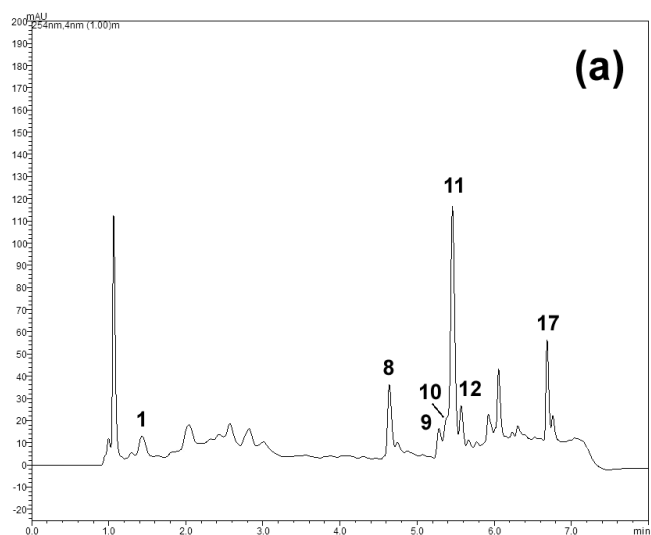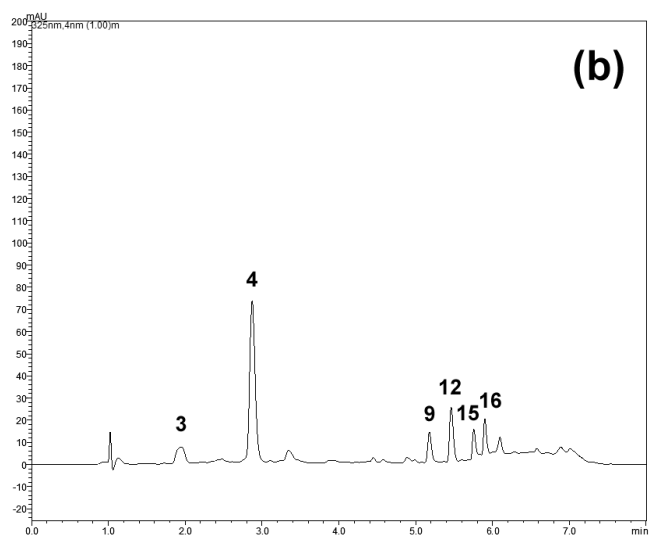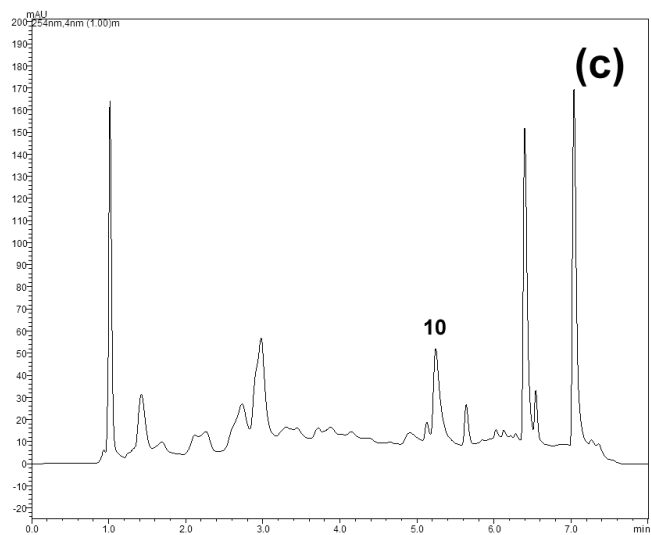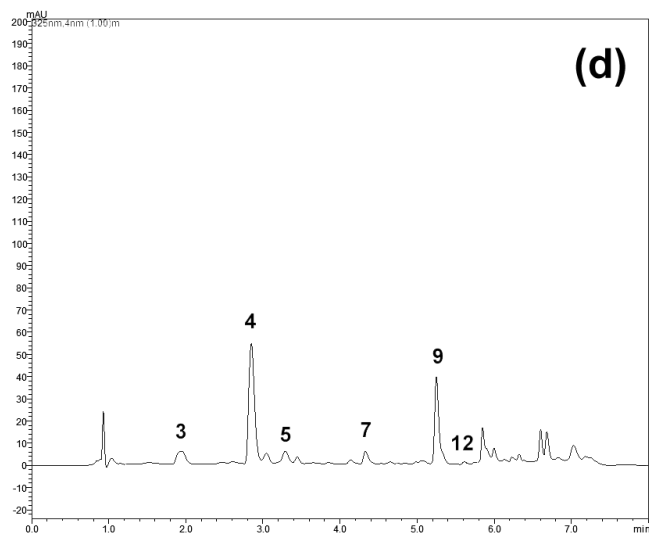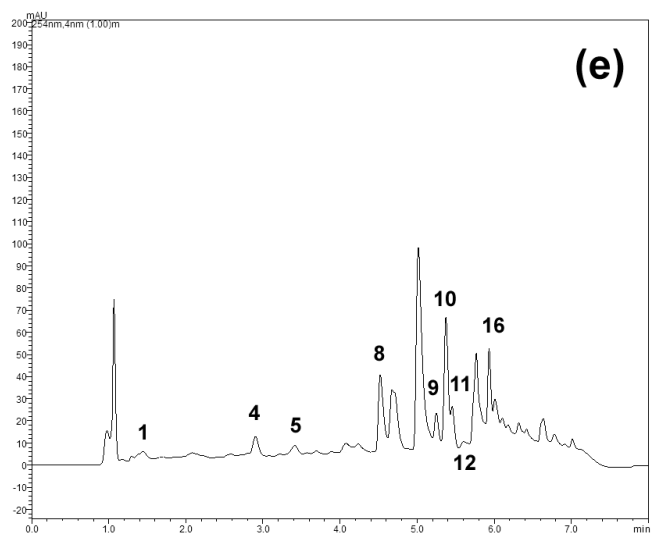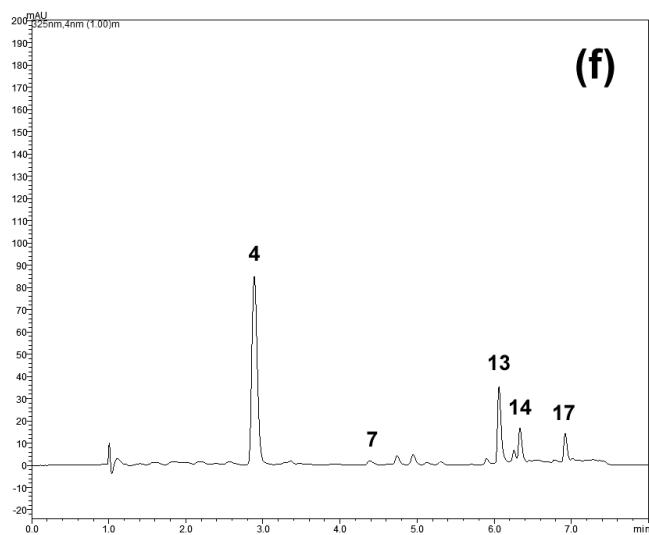

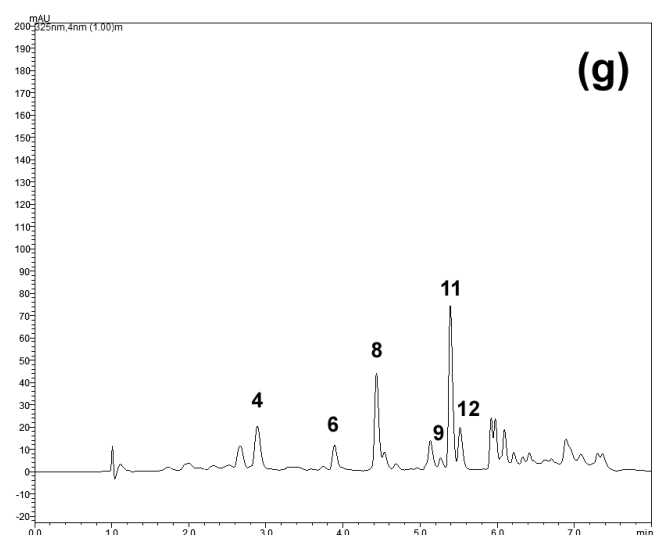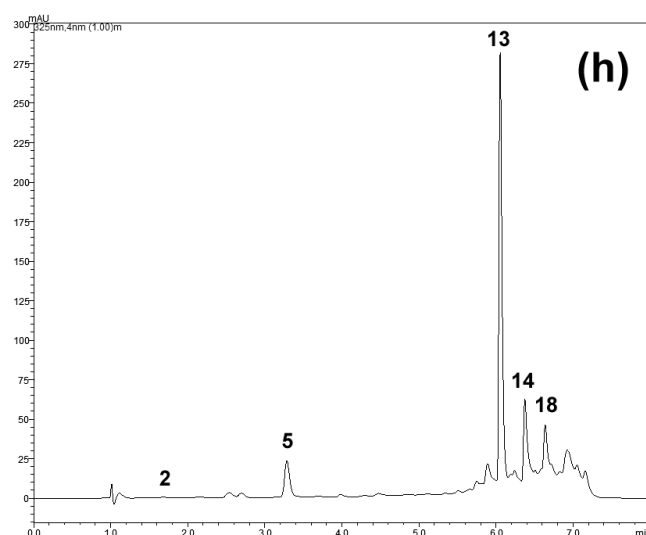

**Figure S1.** HPLC-DAD chromatograms of the studied plant extracts: (a) *Cistus incanus* L. herb; (b) *Morus alba* L. leaves; (c) *Geum urbanum* L. rhizome; (d) *Asarum europaeum* L. herb; (e) *Rubus idaeus* L. leaves; (f) *Angelica archangelica* L. root; (g) *Betula pendula* Roth. leaves; (h) *Melissa officinalis* L. leaves. 1-Gallic acid; 2-(+)-Catechin; 3-Neochlorogenic acid; 4-Chlorogenic acid; 5-Caffeic acid; 6-*p*-Coumaric acid; 7-Ferulic acid; 8-Peltatoside; 9-Rutoside; 10-Ellagic acid; 11-Hyperoside; 12-Isoquercetin; 13-Cichoric acid; 14-Isochlorogenic acid B; 15-Nicotiflorin; 16-Astragalin; 17-Tiliroside; 18-Rosmarinic acid.

**Table S1.** Characteristic parameters of the HPLC analysis.

| Number | Compound                                                  | Calibration equation    | R <sup>2</sup> (n=6) | Linear range (mg/mL) | LOD (µg/L) | LOQ (µg/L) |
|--------|-----------------------------------------------------------|-------------------------|----------------------|----------------------|------------|------------|
| 1      | Gallic acid<br>(3,4,5-trihydroxybenzoic acid)             | $y = 8214.7x - 5786.2$  | 0.9996               | 0.38-377.9           | 15.58      | 51.93      |
| 2      | (+)-Catechin                                              | $y = 8216.4x - 6069.3$  | 0.9998               | 0.95-950.00          | 10.90      | 36.40      |
| 3      | Neochlorogenic acid<br>(5- <i>O</i> -caffeoylquinic acid) | $y = 1809.0x + 1539.8$  | 0.9996               | 0.39-392.00          | 18.39      | 61.31      |
| 4      | Chlorogenic acid<br>(3- <i>O</i> -caffeoylquinic acid )   | $y = 6517.4x - 12016.6$ | 0.9997               | 0.40-394.6           | 20.97      | 69.90      |
| 5      | Caffeic acid<br>(3,4-dihydroxycinnamic acid)              | $y = 2592.9x + 379.6$   | 0.9996               | 1.00-998.40          | 2.50       | 8.32       |
| 6      | <i>p</i> -Coumaric acid                                   | $y = 6196.4x - 537.5$   | 0.9999               | 1.01-1008.70         | 6.87       | 22.90      |
| 7      | Ferulic acid<br>(4-hydroxy-3-methoxycinnamic acid)        | $y = 2424.6x - 1856.9$  | 0.9995               | 0.40-399.68          | 10.57      | 35.23      |
| 8      | Peltatoside<br>(quercetin-3- <i>O</i> -arabinoglucoside)  | $y = 1432.7x + 1350.0$  | 0.9999               | 0.93-927.34          | 36.32      | 121.06     |
| 9      | Rutoside<br>(quercetin 3- <i>O</i> -rutinoside)           | $y = 1434.0x - 5093.0$  | 0.9999               | 0.91-906.70          | 7.46       | 24.88      |
| 10     | Ellagic acid                                              | $y = 8108.6x + 3974.2$  | 0.9999               | 1.00-999.88          | 6.50       | 20.16      |
| 11     | Hyperoside<br>(quercetin 3- <i>O</i> -galactoside)        | $y = 3435.5x - 6882.2$  | 0.9999               | 0.38-384.00          | 12.24      | 92.1       |

Table S1. *cont.*

| Number | Compound                                                              | Calibration equation   | R <sup>2</sup> (n=6) | Linear range (mg/mL) | LOD (µg/L) | LOQ (µg/L) |
|--------|-----------------------------------------------------------------------|------------------------|----------------------|----------------------|------------|------------|
| 12     | Isoquercetin<br>(quercetin 3-O-glucoside)                             | $y = 1969.7x - 7089.8$ | 0.9995               | 0.37-368.80          | 44.92      | 149.61     |
| 13     | Cichoric acid                                                         | $y = 3230.7x + 6882.2$ | 0.9998               | 0.46-456.96          | 11.47      | 38.23      |
| 14     | Isochlorogenic acid B<br>(3,4-di-O-caffeoylquinic acid)               | $y = 3782.2x - 4613.2$ | 0.9994               | 0.19-190.00          | 9.56       | 31.87      |
| 15     | Nicotiflorin<br>(kaempferol 3-O-rutinoside)                           | $y = 2054.6x - 5874.3$ | 0.9998               | 0.48-486.70          | 38.7       | 128.9      |
| 16     | Astragalin<br>(kaempferol 3-O-glucoside)                              | $y = 2104.5x - 2426.3$ | 0.9999               | 0.41-401.91          | 33.0       | 109.9      |
| 17     | Tiliroside<br>(kaempferol-3-O-β-D-(6"-E-p-coumaroyl)-glucopyranoside) | $y = 17306.9x - 671.7$ | 0.9998               | 0.92-922.40          | 7.83       | 26.09      |
| 18     | Rosmarinic acid                                                       | $y = 2017.9x + 1100.4$ | 0.9999               | 0.43-434.02          | 3.20       | 9.82       |
